# Supplementary material
Source: HighWire-hosted journal article supplement (https://www.cmajopen.ca/highwire/filestream/87342/field_highwire_adjunct_files/2/open-2021-0085-3-at.pdf)
Supplement: open-2021-0085-3-at.pdf [file open-2021-0085-3-at.pdf]

**Table S3: Diagnostic measures of COVID-19 symptoms at WCH\***

| <b>Symptoms</b>     | <b>Label</b> | <b>Estimate</b> | <b>Lower</b> | <b>Upper</b> |
|---------------------|--------------|-----------------|--------------|--------------|
| Sore throat         | Sensitivity  | 0.305           | 0.262        | 0.347        |
| Sore throat         | Specificity  | 0.753           | 0.748        | 0.758        |
| Sore throat         | PPV          | 0.018           | 0.015        | 0.022        |
| Sore throat         | NPV          | 0.986           | 0.985        | 0.988        |
| Sore throat         | Accuracy     | 0.746           | 0.741        | 0.751        |
| Sore throat         | LR+          | 1.233           | 1.060        | 1.406        |
| Sore throat         | LR-          | 0.924           | 0.867        | 0.980        |
| Sneezing            | Sensitivity  | 0.150           | 0.117        | 0.183        |
| Sneezing            | Specificity  | 0.908           | 0.904        | 0.911        |
| Sneezing            | PPV          | 0.024           | 0.019        | 0.030        |
| Sneezing            | NPV          | 0.986           | 0.985        | 0.987        |
| Sneezing            | Accuracy     | 0.896           | 0.893        | 0.900        |
| Sneezing            | LR+          | 1.626           | 1.265        | 1.987        |
| Sneezing            | LR-          | 0.936           | 0.900        | 0.973        |
| Shortness of breath | Sensitivity  | 0.068           | 0.045        | 0.092        |
| Shortness of breath | Specificity  | 0.946           | 0.943        | 0.948        |
| Shortness of breath | PPV          | 0.019           | 0.012        | 0.025        |
| Shortness of breath | NPV          | 0.985           | 0.984        | 0.987        |
| Shortness of breath | Accuracy     | 0.932           | 0.930        | 0.935        |
| Shortness of breath | LR+          | 1.257           | 0.826        | 1.688        |
| Shortness of breath | LR-          | 0.985           | 0.960        | 1.010        |
| Runny nose          | Sensitivity  | 0.247           | 0.208        | 0.287        |
| Runny nose          | Specificity  | 0.838           | 0.834        | 0.842        |
| Runny nose          | PPV          | 0.023           | 0.019        | 0.027        |
| Runny nose          | NPV          | 0.986           | 0.985        | 0.988        |
| Runny nose          | Accuracy     | 0.829           | 0.825        | 0.834        |
| Runny nose          | LR+          | 1.528           | 1.280        | 1.777        |
| Runny nose          | LR-          | 0.898           | 0.850        | 0.946        |
| Nausea vomiting     | Sensitivity  | 0.088           | 0.062        | 0.114        |
| Nausea vomiting     | Specificity  | 0.934           | 0.931        | 0.936        |
| Nausea vomiting     | PPV          | 0.020           | 0.014        | 0.026        |
| Nausea vomiting     | NPV          | 0.985           | 0.984        | 0.987        |
| Nausea vomiting     | Accuracy     | 0.921           | 0.918        | 0.924        |
| Nausea vomiting     | LR+          | 1.328           | 0.931        | 1.725        |
| Nausea vomiting     | LR-          | 0.977           | 0.948        | 1.005        |
| Nasal Congestion    | Sensitivity  | 0.177           | 0.141        | 0.212        |
| Nasal Congestion    | Specificity  | 0.879           | 0.875        | 0.882        |
| Nasal Congestion    | PPV          | 0.022           | 0.017        | 0.026        |
| Nasal Congestion    | NPV          | 0.986           | 0.984        | 0.987        |
| Nasal Congestion    | Accuracy     | 0.868           | 0.864        | 0.872        |
| Nasal Congestion    | LR+          | 1.454           | 1.161        | 1.746        |
| Nasal Congestion    | LR-          | 0.937           | 0.897        | 0.977        |

Appendix 3, as supplied by the authors. Appendix to: O'Neill B, Kalia S, Gill P, et al. Association between new-onset anosmia and positive SARS-CoV-2 tests among people accessing outpatient testing in Toronto, Ontario: a retrospective cross-sectional study. *CMAJ Open* 2021. doi: 10.9778/cmajo.20210085. Copyright © 2021 The Author(s) or their employer(s). To receive this resource in an accessible format, please contact us at cmajgroup@cmaj.ca.

|                       |             |       |       |       |
|-----------------------|-------------|-------|-------|-------|
| Myalgias              | Sensitivity | 0.300 | 0.258 | 0.342 |
| Myalgias              | Specificity | 0.902 | 0.899 | 0.905 |
| Myalgias              | PPV         | 0.045 | 0.037 | 0.052 |
| Myalgias              | NPV         | 0.988 | 0.987 | 0.990 |
| Myalgias              | Accuracy    | 0.893 | 0.889 | 0.896 |
| Myalgias              | LR+         | 3.064 | 2.621 | 3.508 |
| Myalgias              | LR-         | 0.776 | 0.729 | 0.823 |
| Hoarse voice          | Sensitivity | 0.071 | 0.047 | 0.094 |
| Hoarse voice          | Specificity | 0.958 | 0.955 | 0.960 |
| Hoarse voice          | PPV         | 0.025 | 0.016 | 0.033 |
| Hoarse voice          | NPV         | 0.985 | 0.984 | 0.987 |
| Hoarse voice          | Accuracy    | 0.944 | 0.942 | 0.947 |
| Hoarse voice          | LR+         | 1.667 | 1.103 | 2.231 |
| Hoarse voice          | LR-         | 0.970 | 0.946 | 0.995 |
| Headache              | Sensitivity | 0.318 | 0.275 | 0.361 |
| Headache              | Specificity | 0.851 | 0.847 | 0.855 |
| Headache              | PPV         | 0.031 | 0.026 | 0.037 |
| Headache              | NPV         | 0.988 | 0.987 | 0.989 |
| Headache              | Accuracy    | 0.843 | 0.838 | 0.847 |
| Headache              | LR+         | 2.128 | 1.835 | 2.421 |
| Headache              | LR-         | 0.802 | 0.751 | 0.852 |
| Fever                 | Sensitivity | 0.298 | 0.256 | 0.340 |
| Fever                 | Specificity | 0.921 | 0.918 | 0.924 |
| Fever                 | PPV         | 0.054 | 0.045 | 0.063 |
| Fever                 | NPV         | 0.988 | 0.987 | 0.990 |
| Fever                 | Accuracy    | 0.911 | 0.908 | 0.915 |
| Fever                 | LR+         | 3.758 | 3.207 | 4.309 |
| Fever                 | LR-         | 0.762 | 0.717 | 0.808 |
| Fatigue               | Sensitivity | 0.276 | 0.235 | 0.317 |
| Fatigue               | Specificity | 0.842 | 0.838 | 0.847 |
| Fatigue               | PPV         | 0.026 | 0.022 | 0.031 |
| Fatigue               | NPV         | 0.987 | 0.986 | 0.988 |
| Fatigue               | Accuracy    | 0.834 | 0.830 | 0.838 |
| Fatigue               | LR+         | 1.751 | 1.486 | 2.017 |
| Fatigue               | LR-         | 0.859 | 0.810 | 0.909 |
| Difficulty swallowing | Sensitivity | 0.031 | 0.015 | 0.047 |
| Difficulty swallowing | Specificity | 0.975 | 0.973 | 0.977 |
| Difficulty swallowing | PPV         | 0.018 | 0.009 | 0.028 |
| Difficulty swallowing | NPV         | 0.985 | 0.984 | 0.986 |
| Difficulty swallowing | Accuracy    | 0.961 | 0.958 | 0.963 |
| Difficulty swallowing | LR+         | 1.224 | 0.587 | 1.861 |
| Difficulty swallowing | LR-         | 0.994 | 0.978 | 1.011 |
| Diarrhea              | Sensitivity | 0.097 | 0.070 | 0.124 |
| Diarrhea              | Specificity | 0.922 | 0.919 | 0.925 |
| Diarrhea              | PPV         | 0.019 | 0.013 | 0.024 |

Appendix 3, as supplied by the authors. Appendix to: O'Neill B, Kalia S, Gill P, et al. Association between new-onset anosmia and positive SARS-CoV-2 tests among people accessing outpatient testing in Toronto, Ontario: a retrospective cross-sectional study. *CMAJ Open* 2021. doi: 10.9778/cmajo.20210085. Copyright © 2021 The Author(s) or their employer(s). To receive this resource in an accessible format, please contact us at [cmajgroup@cmaj.ca](mailto:cmajgroup@cmaj.ca).

|                 |             |        |       |        |
|-----------------|-------------|--------|-------|--------|
| Diarrhea        | NPV         | 0.985  | 0.984 | 0.987  |
| Diarrhea        | Accuracy    | 0.910  | 0.907 | 0.913  |
| Diarrhea        | LR+         | 1.249  | 0.895 | 1.603  |
| Diarrhea        | LR-         | 0.979  | 0.949 | 1.009  |
| Cough           | Sensitivity | 0.450  | 0.405 | 0.496  |
| Cough           | Specificity | 0.827  | 0.822 | 0.831  |
| Cough           | PPV         | 0.038  | 0.033 | 0.043  |
| Cough           | NPV         | 0.990  | 0.989 | 0.991  |
| Cough           | Accuracy    | 0.821  | 0.817 | 0.825  |
| Cough           | LR+         | 2.596  | 2.324 | 2.868  |
| Cough           | LR-         | 0.665  | 0.609 | 0.721  |
| Change in taste | Sensitivity | 0.130  | 0.099 | 0.161  |
| Change in taste | Specificity | 0.984  | 0.983 | 0.986  |
| Change in taste | PPV         | 0.112  | 0.085 | 0.138  |
| Change in taste | NPV         | 0.987  | 0.985 | 0.988  |
| Change in taste | Accuracy    | 0.971  | 0.969 | 0.973  |
| Change in taste | LR+         | 8.219  | 6.129 | 10.310 |
| Change in taste | LR-         | 0.884  | 0.852 | 0.915  |
| Anosmia         | Sensitivity | 0.163  | 0.129 | 0.197  |
| Anosmia         | Specificity | 0.987  | 0.986 | 0.988  |
| Anosmia         | PPV         | 0.162  | 0.128 | 0.195  |
| Anosmia         | NPV         | 0.987  | 0.986 | 0.988  |
| Anosmia         | Accuracy    | 0.975  | 0.973 | 0.976  |
| Anosmia         | LR+         | 12.618 | 9.705 | 15.531 |
| Anosmia         | LR-         | 0.848  | 0.813 | 0.882  |
| Abdominal pain  | Sensitivity | 0.055  | 0.034 | 0.076  |
| Abdominal pain  | Specificity | 0.951  | 0.949 | 0.954  |
| Abdominal pain  | PPV         | 0.017  | 0.010 | 0.024  |
| Abdominal pain  | NPV         | 0.985  | 0.984 | 0.986  |
| Abdominal pain  | Accuracy    | 0.938  | 0.935 | 0.940  |
| Abdominal pain  | LR+         | 1.130  | 0.696 | 1.564  |
| Abdominal pain  | LR-         | 0.993  | 0.971 | 1.016  |
